# Supplementary material
Source: PubMed Central journal article supplement (PMC3289496)
Supplement: supp_kfr335_KFR335_toxsci-11-0917-File009.pdf [file supp_kfr335_KFR335_toxsci-11-0917-File009.pdf]

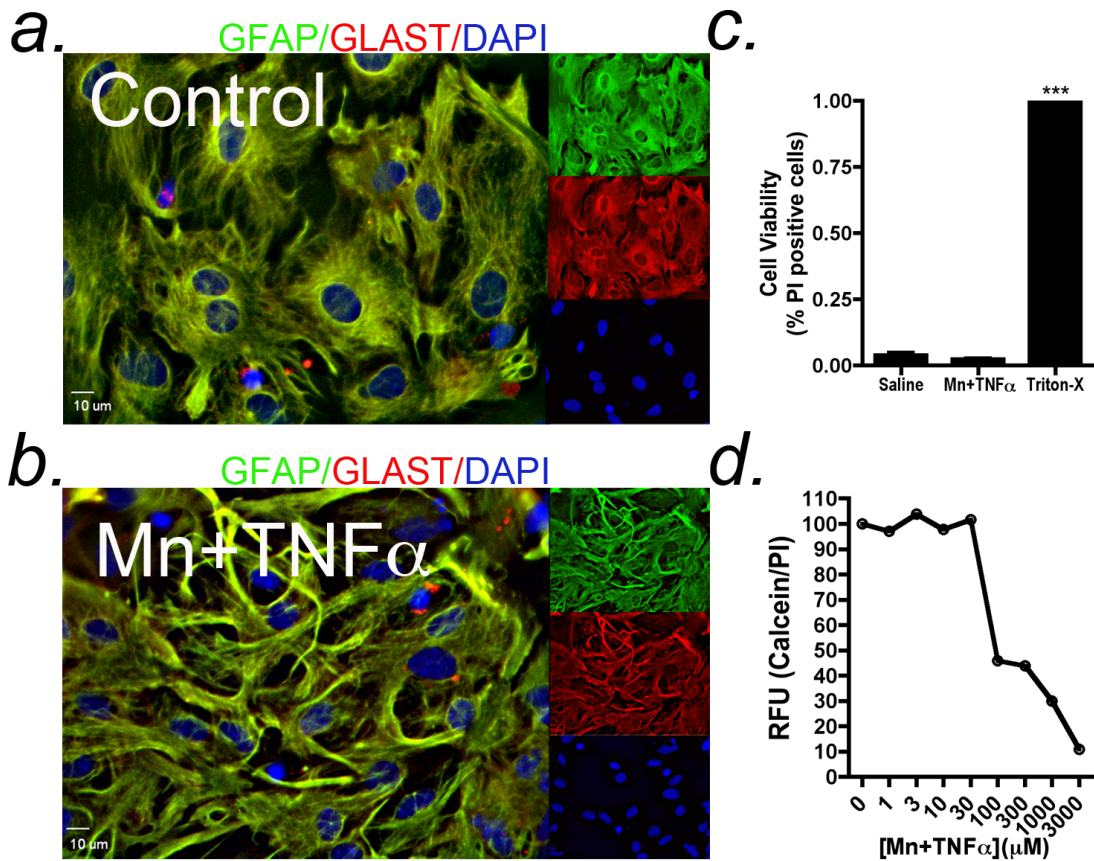

**Supplemental Figure 1. Astrocyte viability after 24 h treatment with MnCl<sub>2</sub> and TNF $\alpha$ .** Assessment of astrocyte after 24 h with 30  $\mu$ M with Mn and 10 pg/ml TNF $\alpha$  (Mn+TNF $\alpha$ ) verified viable cells for co-culture studies. (a-b) Representative images of astrocytes treated with saline or Mn+TNF $\alpha$  and examined by immunofluorescence for expression of GFAP (1:500, Cell Signaling, Green) and the high affinity glutamate transporter, GLAST (2  $\mu$ g/mL, Miltenyi, red). Treated astrocyte display an activated phenotype, with formation of stress fibers and hypertrophy of cytoplasmic processes, without loss of GLAST expression. (c) Percent of total cells treated with Mn+TNF $\alpha$  were positive for nuclear staining with the propidium iodide (5  $\mu$ g/mL; Sigma). Triton-X treatment (1%, 15 min) was used as a positive control. (d) Dose-response viability data using the live/dead assay with calcein and propidium iodide in astrocytes treated with increasing concentrations of Mn in the presence of 10 pg/ml TNF $\alpha$ . \*\*\*  $p < 0.001$ .
