# Supplementary material
Source: PubMed Central journal article supplement (PMC3289496)
Supplement: supp_kfr335_KFR335_toxsci-11-0917-File010.pdf [file supp_kfr335_KFR335_toxsci-11-0917-File010.pdf]

**Supplemental Table 1. Accumulation of Mn<sup>2+</sup>, Cu<sup>2+</sup>, and Fe<sup>2+</sup> in multiple brain regions in wildtype and NOS2<sup>-/-</sup> mice exposed to Mn.**

| Metal                  | Mouse               | Treatment (MnCl <sub>2</sub> ) | SNpr       | Cortex     | Hypothalamus |
|------------------------|---------------------|--------------------------------|------------|------------|--------------|
| <b>Mn<sup>2+</sup></b> | C57Bl/6             | 0 mg/kg                        | 0.30±0.06  | 0.32±0.07  | 0.35±0.04    |
|                        |                     | 50 mg/kg                       | 1.14±0.08* | 0.53±0.012 | 0.89±0.15*   |
|                        | NOS2 <sup>-/-</sup> | 0 mg/kg                        | 0.26±0.13  | 0.19±0.01  | 0.21±0.008   |
|                        |                     | 50mg/kg                        | 0.74±0.15* | 0.77±0.01* | 0.65±0.035*  |
| <b>Cu<sup>2+</sup></b> | C57Bl/6             | 0 mg/kg                        | 1.32±0.21  | 1.44±0.04  | 1.26±0.04    |
|                        |                     | 50mg/kg                        | 2.09±0.23  | 1.57±0.008 | 1.80±0.30    |
|                        | NOS2 <sup>-/-</sup> | 0 mg/kg                        | 0.88±0.15  | 1.49±0.07  | 1.11±0.08    |
|                        |                     | 50mg/kg                        | 1.65±0.18  | 1.34±0.01  | 1.51±0.04    |
| <b>Fe<sup>2+</sup></b> | C57Bl/6             | 0 mg/kg                        | 7.27±2.72  | 7.06±0.36  | 6.13±0.56    |
|                        |                     | 50 mg/kg                       | 11.9±4.39  | 8.38±0.69  | 9.52±1.16    |
|                        | NOS2 <sup>-/-</sup> | 0 mg/kg                        | 11.0±2.17  | 6.95±0.29  | 6.44±0.27    |
|                        |                     | 50mg/kg                        | 12.1±0.85  | 6.80±0.06  | 6.89±0.04    |

Data shown are mean ± SEM (n = 3-4). \**p*<0.05 (Significance within genotypes was calculated using one-way ANOVA followed by the Tukey-Kramer multiple comparison *post hoc* test.)
